# Supplementary material for: Small intestine submucosa decorated 3D printed scaffold accelerated diabetic bone regeneration by ameliorating the microenvironment
Source: Royal Society of Chemistry journal article supplement (doi:10.1039/d4tb00772g), 2024-01-01
Supplement: d4tb00772g1.pdf [file d4tb00772g1.pdf]

## Electronic Supporting Information

### **Small Intestine Submucosa decorated 3D printed scaffold accelerated diabetic bone regeneration by ameliorating the microenvironment**

Jie Tan<sup>1,2,3,a</sup>, Zecai Chen<sup>2,a</sup>, Zhen Xu<sup>2,a</sup>, Yafang Huang<sup>2,3</sup>, Lei Qin<sup>2</sup>, Yufeng Long<sup>2</sup>, Jiayi Wu<sup>2</sup>, Hantao Yang<sup>2</sup>, Xuandu Chen<sup>2</sup>, Weihong Yi<sup>2</sup>, Ruiqiang Hang<sup>4</sup>, Min Guan<sup>1</sup>, Huaiyu Wang<sup>1,#</sup>, Ang Gao<sup>1,#</sup>, Dazhi Yang<sup>2,#</sup>

<sup>1</sup>Center for Human Tissues and Organs Degeneration, Shenzhen Institute of Advanced Technology, Chinese Academy of Sciences, Shenzhen, 518055, China

<sup>2</sup>Department of Spine Surgery & Innovative Laboratory of Orthopedics, Huazhong University of Science and Technology Union Shenzhen Hospital, Shenzhen, 518052, China

<sup>3</sup>Orthopaedic department, Wuhan Fourth Hospital, Wuhan, 430030, China

<sup>4</sup>Shanxi Key Laboratory of Biomedical Metal Materials, Taiyuan University of Technology, Taiyuan, 030024, China

<sup>a</sup>These authors have contributed equally to this work.

**Table S1** PCR primers for genes associated with macrophage polarization

| Gene           | Primer sequence (5'→3')    |
|----------------|----------------------------|
| <i>IL-10</i>   | F: GCTCTTACTGACTGGCATGAG   |
|                | R: CGCAGCTCTAGGAGCATGTG    |
| <i>IGF-1</i>   | F: AAATCAGCAGCCTTCCAATC    |
|                | R: GCACTTCCTCTACTTGTGTTCTT |
| <i>β-actin</i> | F: GGCTGTATTCCCCTCCATCG    |
|                | R: CCAGTTGGTAACAATGCCATGT  |

**Table S2** PCR primers for genes associated with angiogenesis

| Gene          | Primer sequence (5'→3')                            |
|---------------|----------------------------------------------------|
| <i>VEGF</i>   | F: TCGGATCAAACCTCACCA<br>R: CAGGGATTTTTCTTGTCTTGCT |
| <i>Notch1</i> | F: GACTGCTCCCTCAACTTCAAT<br>R: GTGGTCCTGCAGTACTGGT |
| <i>GAPDH</i>  | F: GATTTGGTCGTATTGGGCG<br>R: CTGGAAGATGGTGATGG     |

**Table S3** PCR primers for genes associated with osteogenesis

| Gene                            | Primer sequence (5'→3')                              |
|---------------------------------|------------------------------------------------------|
| <i>Runx2</i>                    | F: ATACCCCCTCGCTCTCTGTT<br>R: ACATAGGTCCCATCTGCCT    |
| <i>Colla</i>                    | F: CCCTGGTCCCTCTGGAAATG<br>R: GGACCTTTGCCCCCTTCTTT   |
| <i><math>\beta</math>-actin</i> | F: GGCTGTATTCCCCTCCATCG<br>R: CCAGTTGGTAACAATGCCATGT |

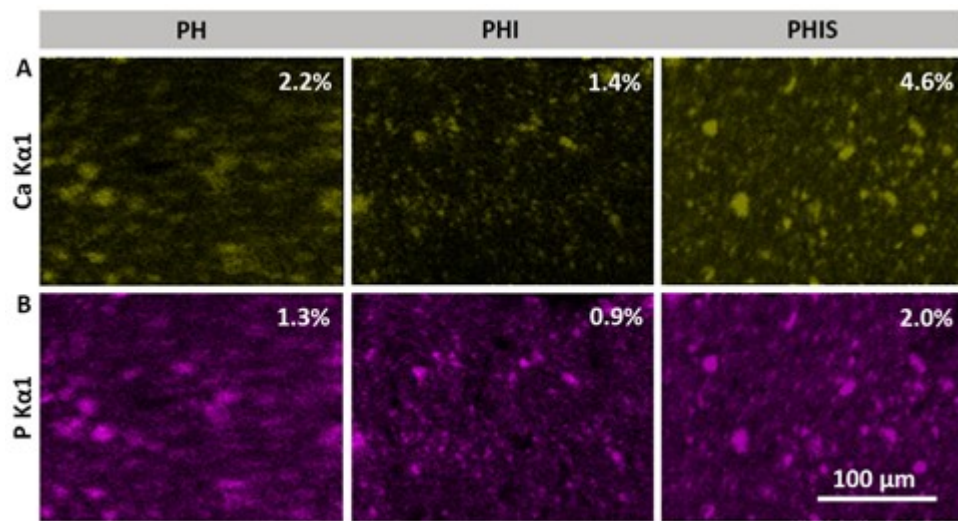

**Fig. S1** The EDS analyses of calcium and phosphorus of the 3D-printed scaffolds. (A) Calcium distribution; (B) Phosphorus distribution.

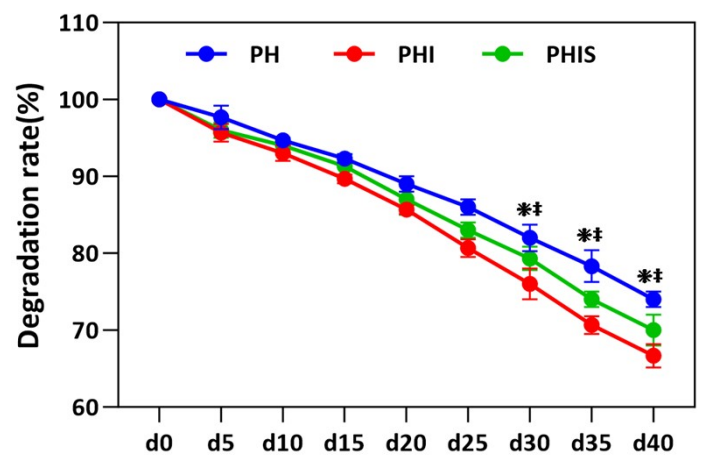

**Fig. S2** The degradation behavior of those 3D-printed scaffolds.

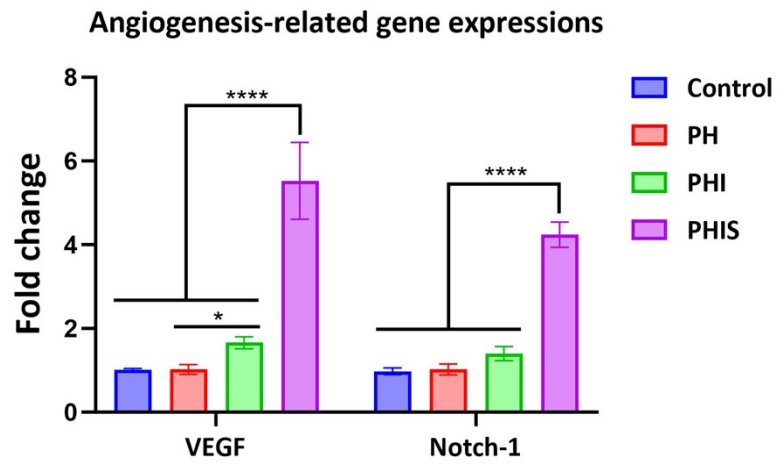

**Fig. S3** The mRNA expression profiles of angiogenesis-related genes.
